# Supplementary material for: Nubbin isoform antagonism governs Drosophila intestinal immune homeostasis
Source: PLoS Pathog. 2018 Mar 2;14(3):e1006936. doi: 10.1371/journal.ppat.1006936 (PMC5851638; doi:10.1371/journal.ppat.1006936)
Supplement: S5 Table — (XLSX) [file ppat.1006936.s012.xlsx]

## Sheet: Blad1
Putative immune genes		c564-Gal4>nub-PB		BIOLOGICAL FUNCTION		Putative immune genes		c564-Gal4>nub-PB		BIOLOGICAL FUNCTION
Gene Symbol	#	Rest, FC	Gut, FC	Gene Function		Gene Symbol	#	Rest, FC	Gut, FC	Gene Function
				AMPs, IRON SEQUESTRATION, LYSOZYME						SIGNALING, TRANSCRIPTION FACTORS
Dpt		700.523	20.8935	Antimicrobial peptide		mthl2		6.62716	bt	G-protein coupled receptor activity
DptB		186.207	13.8478	Antimicrobial peptide		Spn88Eb	#	5.8042	bt	Serine protease inhibitor, Toll signaling pathway
AttC		156.472	27.0548	Antimicrobial peptide		p38c	#	3.56182	bt	MAPK pathway
CecA2		150.05	bt	Antimicrobial peptide		Ser		4.00842	bt	Notch ligand, crystal cell specification
Mtk		141.537	14.8193	Antimicrobial peptide		Pvf2		3.92172	bt	Growth factor
AttB		120.493	28.5915	Antimicrobial peptide		Arc1		3.72828	bt	DNA binding, Zn finger
AttA		114.193	69.2128	Antimicrobial peptide		Hand		3.62835	bt	Transcription factor, Myc-type
CecA1		76.2607	5.57132	Antimicrobial peptide		pnr		3.21621	bt	Transcription factor, GATA family
CecC		52.2649	bt	Antimicrobial peptide		SPE		3.04866	bt	Serine protease, Toll pathway signaling
AttD		23.3302	2.32157	Antimicrobial peptide		Spn42Dd	#	2.89482	bt	Serine protease inhibitor, Toll signaling pathway
Drs		10.6197	bt	Antimicrobial peptide		spirit		2.79079	bt	Serine protease, Toll pathway signaling
Def		10.179	bt	Antimicrobial peptide		spheroide		2.69564	bt	Serine protease, Toll pathway signaling
Tsf1		8.25884	2.2694	Iron sequestration		nec		2.6868	bt	Protease, Toll pathway signaling
LysX	#	bt	6.88836	Lysozyme		Toll-6	#	bt	-21.9007	Toll-like receptor
Tsf3		5.32666	3.19486	Iron sequestration		R		-2.21323	3.48843	Small GTP-binding protein
dro3		4.57254	bt	Antimicrobial peptide		mthl8		-37.9236	-194.08	G protein coupled receptor activity
CG16756		4.51852	bt	Lysozyme activity
dro4		3.68848	bt	Antimicrobial peptide						PHAGOCYTOSIS, ENCAPSULATION
dro5		3.53386	-4.78092	Antimicrobial peptide		lectin-37Da	#	20.9336	7.71214	lectin-galC1 like protein that enhances encapsulation
Zip3	#	3.01205	2.1677	Iron-Zinc transporter		NimC4	#	12.9698	-7.94317	Nimrod/Eater/Draper family of phagocytosis receptors
LysC		2.65994	3.83322	Lysozyme		NimC2	#	7.4276	bt	Nimrod/Eater/Draper family of phagocytosis receptors
Dro2	#	bt	41.3456	Antimicrobial peptide		NimC1	#	5.77233	bt	Nimrod/Eater/Draper family of phagocytosis receptors
LysP		-4.87424	32.2683	Lysozyme		He		4.6773	bt	Transmembrane glycophorin-like, encapsulation
						eater	#	4.32236	bt	Nimrod/Eater/Draper family of phagocytosis receptors
				IMMUNE-INDUCED PEPTIDES		Sr-CIV		4.0183	bt	Scavenger receptor class C, type IV
IM18		363.044	19.9057	Immune-induced small peptide		DNaseII	#	3.25953	bt	Lysosomal enzyme
IM23		27.3128	2.31297	Immune-induced small peptide/Bomanin		Sr-CI		3.38599	bt	Scavenger receptor class C, type I
CG4269	#	15.7488	bt	Immune-induced small peptide		NimB4	#	3.09634	bt	Nimrod/Eater/Draper family of phagocytosis receptors
CG30080	#	12.957	bt	Immune-induced small peptide		Idgf1	#	2.90275	2.04338	Chitin binding and growth factor activity in cell culture
IM10		12.3689	3.12442	Immune-induced small peptide		NimB5	#	2.64491	bt	Nimrod/Eater/Draper family of phagocytosis receptors
IM4		11.8114	5.54066	Immune-induced small peptide		NimB1	#	2.58229	bt	Nimrod/Eater/Draper family of phagocytosis receptors
CG15065	#	11.4104	2.05287	Immune-induced small peptide/Bomanin		santa-maria		2.50381	bt	crq-like, scavenger receptor activity
IM14		11.3707	2.81353	Immune-induced small peptide		CG2736	#	bt	-2.57992	Putative receptor of the CD36/crq family
IM1		8.31057	bt	Immune-induced molecule/Bomanin		CG31741	#	bt	-5.01281	Putative receptor of the CD36/crq family
CG16836	#	6.7513	bt	Immune-induced small peptide/Bomanin		NFAT		-2.41076	-2.87038	Transcription factor
IM3		6.14034	3.72327	Immune-induced small peptide/Bomanin		Sr-CII	#	bt	-9.00956	Scavenger receptor class C, type II
CG4250	#	5.7655	bt	Immune-induced small peptide
IM2		5.05904	bt	Immune-induced small peptide/Bomanin
CG5791	#	4.54164	-2.00084	Immune-induced small peptide						MELANIZATION, COAGULATION
CG17107	#	4.44114	bt	Immune-induced small peptide		PPO1	#	7.68619	bt	proPOphenoloxidase, melanization
CG16978	#	3.81858	bt	Immune-induced small peptide		PPO2	#	5.62531	-2.10133	proPOphenoloxidase, melanization
CG9928	#	3.58261	bt	Immune-induced small peptide		ple		3.90961	bt	Tyrosine hydrolase, melanization
CG13324	#	2.39433	2.94702	Immune-induced small peptide		Hml		2.8113	bt	Coagulation/Clotting
CG6429	#	2.29373	bt	Immune-induced small peptide		Pu	#	2.50175	bt	GTP cyclohydrolase, melanization
CG9616	#	bt	-16.1306	Immune-induced small peptide		yellow-f	#	2.33292	bt	dopachrome conversion enzyme, melanization
CG5773	#	-4.18937	-6.74438	Immune-induced small peptide		Dhpr	#	-60.4894	-74.6362	Melanization
				ROS, STRESS, HEAT-SHOCK RESPONSE						OTHER IMMUNE- REGULATED GENES
TotC		5.74967	bt	Stress factor		SPH93	#	410.857	195.664	Immune-induced serine protease
TotM		5.38465	bt	Stress factor		CG18563	#	89.2325	13.3522	Immune-induced serine protease
TotX		4.13513	bt	Stress factor		CG33462	#	84.7748	bt	Immune-induced serine protease
Irc		2.68285	bt	ROS homeostasis		Sid	#	36.1813	5.22304	Infection-induced Dnase
DJ-1alpha		2.70832	2.48712	Response to oxidative stress		Lsp1beta	#	34.4501	15.4538	Immun-induced serum protein
Hsc70-1		2.51828	bt	Heat-shock protein		CG30090	#	7.86417	bt	Immune-induced serine protease
Hsp20		2.40722	bt	Heat--shock protein		CG18477	#	7.42383	bt	Immune-induced protease
Pxn		2.42332	bt	Response to oxidative stress		Mec2	#	6.09278	bt	stomatin family
Hsp70Bbb		-2.32903	bt	Heat-shock protein		CG16713	#	5.29865	bt	Kunitz ser-protease inhibitor
Hsp70Aa		-3.04784	bt	Heat-shock protein		CG9649	#	4.08554	2.10966	Immune-induced serine protease-like
						CG6357	#	3.80181	bt	Immune-induced protease
				MICROBIAL RECOGNITION		Gld		3.75619	bt	Glucose dehydrogenase
PGRP-SB1		27.3018	3.4746	Microbial recognition, PGRP family		CG9631	#	3.03665	bt	Immune-induced serine protease-like
GNBP-like3		11.2333	bt	Microbial recognition, GNBP family		Obp99d		2.93606	bt	Odorant-binding protein
PGRP-SD		3.74088	bt	Microbial recognition, PGRP family		Est-6		2.77944	bt	Carboxylesterase
PGRP-SA		3.41276	bt	Microbial recognition, PGRP family		Phk-3		2.61686	bt	Immune-induced protein kinase
CG12780	#	2.24442	bt	Microbial recognition, GNBP-like		CG9733		2.59236	bt	Immune-induced serine protease
PGRP-SC1b		-10.3327	bt	Microbial recognition, PGRP family		Ser7	#	2.59018	bt	Immune-induced serine protease-like
						Spn28Dc	#	2.33504	bt	Immune-induced serine protease-like
				VIRUS-INDUCED		Msh6		2.29856	5.28932	DNA repair
pst	#	5.78206	2.1174	Involved in virus resistance/response		CG3604	#	2.21398	bt	Kunitz ser-protease inhibitor
Diedel	#	6.6617	bt	Involved in virus resistance/response		pen-2		2.1099	bt	Gamma secretase complex
						CG5493	#	bt	-12.4072	cysteine dioxygenase homolog
				IMMUNE-INDUCED WITH UNKNOWN FUNCTION		mask		-2.03252	bt	RNA binding
CG13905	#	16.9176	3.75651	Immune-induced with unknown function		drd		-2.32581	bt	Acyl-transferase
CG13311	#	9.3209	2.97943	Immune-induced with unknown function		Jon65Aiv	#	-2.81411	bt	Immune-induced serine protease-like
CG2217	#	8.5106	bt	Immune-induced with unknown function		to		-3.0933	bt	Juvenile hormone binding
CG42807	#	7.45466	2.03917	Immune-induced with unknown function		Aats-asp	#	-183.733	-152.742	Aspartyl-tRNA synthetase
CG18067	#	6.34483	bt	Immune-induced with unknown function
CG13795	#	5.79225	bt	Immune-induced with unknown function
CG15067	#	4.09864	bt	Immune-induced with unknown function
CG11413	#	3.78706	bt	Immune-induced with unknown function
CG13641	#	3.64361	bt	Immune-induced with unknown function
CG13077	#	3.38945	bt	Immune-induced with unknown function
CG33307	#	3.33536	bt	Immune-induced with unknown function
CG16772	#	3.25052	4.44457	Immune-induced with unknown function
CG5778	#	3.01791	bt	Immune-induced with unknown function
CG15293	#	2.92249	bt	Immune-induced with unknown function
CG6357	#	2.87291	bt	Immune-induced with unknown function
CG7695	#	2.45479	bt	Immune-induced with unknown function
CG6426	#	2.41173	bt	Immune-induced with unknown function
CG14401	#	2.18095	bt	Immune-induced with unknown function
CG17560	#	2.0461	2.24867	Immune-induced with unknown function
CG10912	#	bt	2.61045	Immune-induced with unknown function
CG15282	#	bt	-6.65005	Immune-induced with unknown function
